# Supplementary material for: Boosted photocatalytic nitrogen fixation by bismuth and oxygen vacancies in Bi2MoO6/BiOBr composite structures
Source: Royal Society of Chemistry journal article supplement (doi:10.1039/d1cy00539a), 2021-01-01
Supplement: d1cy00539a1.pdf [file d1cy00539a1.pdf]

Electronic Supplementary Material (ESI) for Catalysis Science & Technology.  
This journal is © The Royal Society of Chemistry 2021

## Electronic supplementary information (ESI)

### Boosted photocatalytic nitrogen fixation by bismuth and oxygen vacancies in $\text{Bi}_2\text{MoO}_6/\text{BiOBr}$ composite structures

Yi Zhang<sup>‡</sup>, Shuo Gu<sup>‡</sup>, Xiaoyu Zhou, Kaiyue Gao, Kai Sun, Di Wu, Jingjing Xia and Xiufang Wang<sup>\*</sup>

*School of Materials and Chemical Engineering, Anhui Jianzhu University, Hefei 230601, China.*

*\* Correspondence: E-mail: [wxfrye159@sina.com](mailto:wxfrye159@sina.com).*

*‡ These authors contributed equally to this work.*

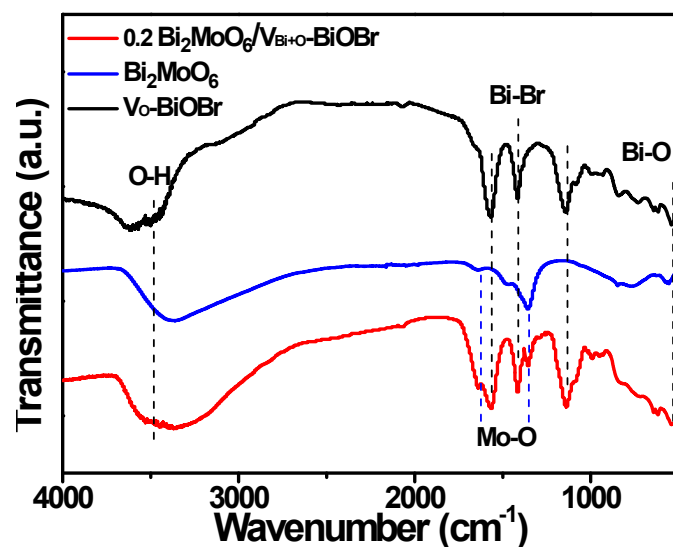

Fig. S1 FT-IR spectrum of Bi<sub>2</sub>MoO<sub>6</sub>, V<sub>0</sub>-BiOBr and 0.2 Bi<sub>2</sub>MoO<sub>6</sub>/V<sub>Bi+O</sub>-BiOBr samples, respectively.

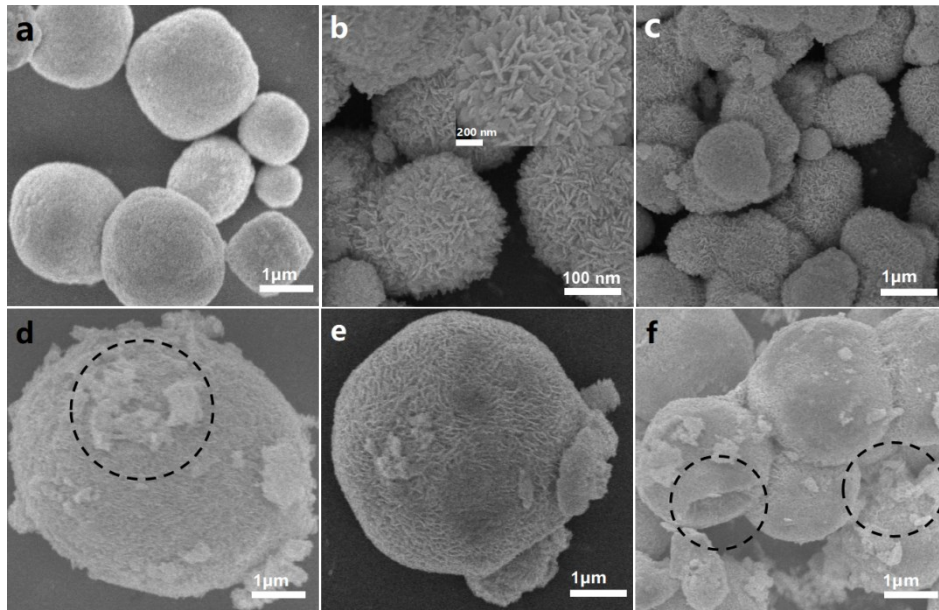

**Fig. S2** (a) SEM images of Vo-BiOBr, (b-c) Bi<sub>2</sub>MoO<sub>6</sub>, (d-e) 0.1 Bi<sub>2</sub>MoO<sub>6</sub>/V<sub>Bi+O</sub>-BiOBr and (f) 0.3 Bi<sub>2</sub>MoO<sub>6</sub>/V<sub>Bi+O</sub>-BiOBr composite.

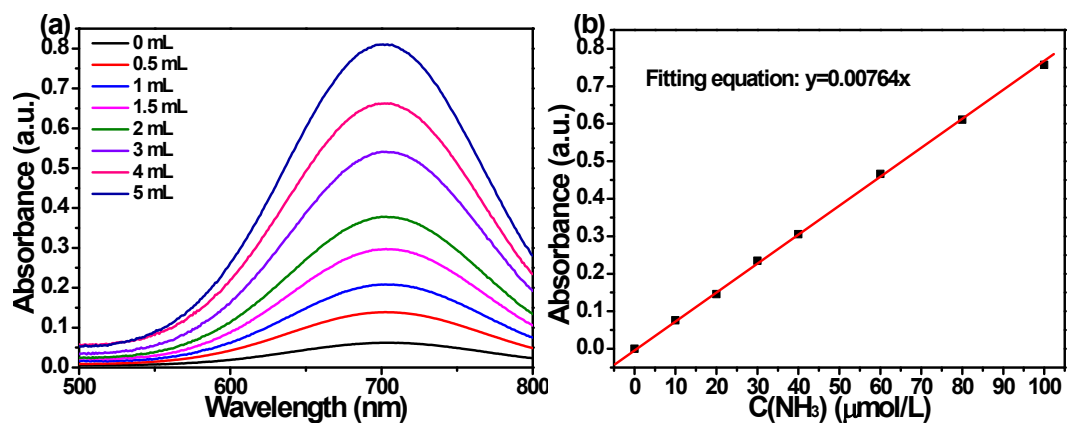

Fig. S3 Calibration for  $\text{NH}_4^+$  determination. (a) Absorption spectra of ammonia chloride solutions with different concentrations through the indophenol blue method and (b) Linear relationship between the peak absorbance at 700 nm and the  $\text{NH}_4^+$  concentration.

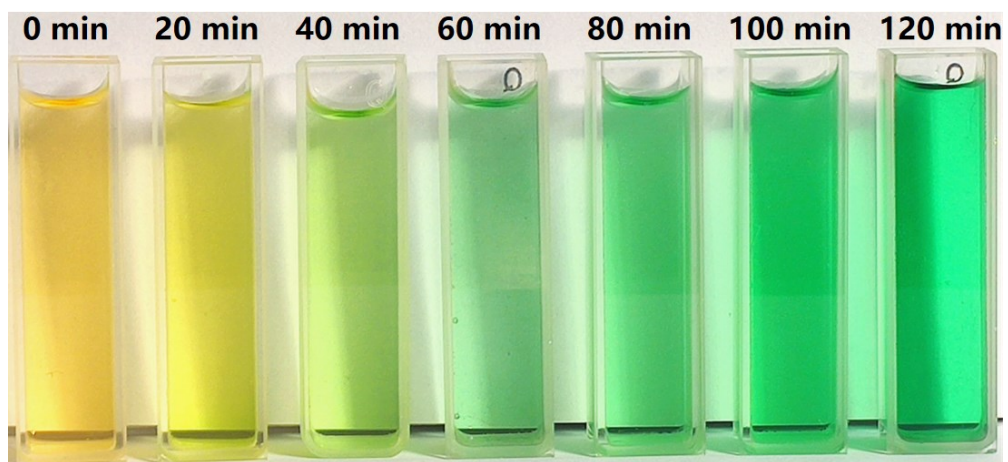

**Fig. S4** Photograph of the aliquots obtained during  $N_2$  photofixation with the  $0.2 \text{ Bi}_2\text{MoO}_6/\text{V}_{\text{Bi}+\text{O}}\text{-BiOBr}$  sample and subjected to the indophenol-blue test. The colors of the solutions change gradually with the irradiation time.

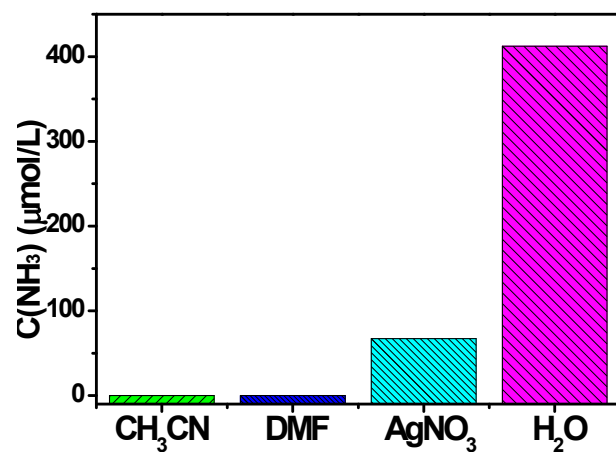

Fig. S5 Photocatalytic N<sub>2</sub> fixation with using aprotic solvents (CH<sub>3</sub>CN and DMF) instead of water or added AgNO<sub>3</sub> as the electron scavenger.

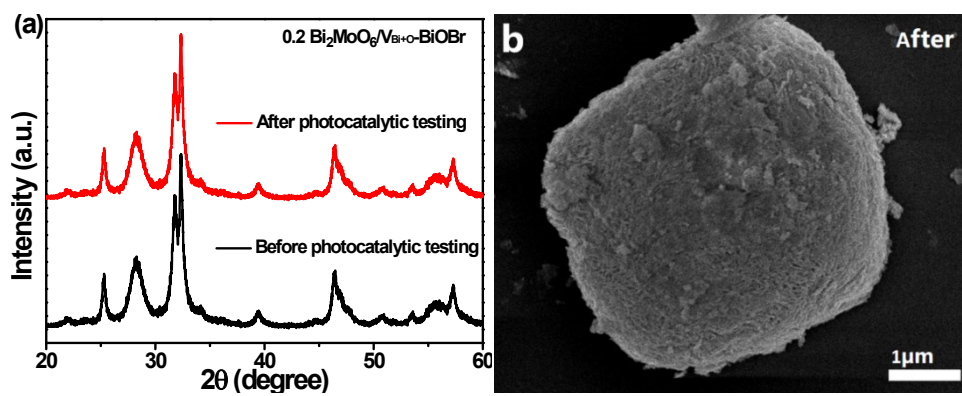

**Fig. S6** (a) XRD patterns and (b) SEM image of  $0.2 \text{ Bi}_2\text{MoO}_6/\text{VBi}^{+\text{O}}\text{-BiOBr}$  before and after five cycles of photocatalytic nitrogen fixation tests.

**Table S1.** XPS surface element analysis of the  $V_{O}$ -BiOBr and 0.2  $Bi_2MoO_6/V_{Bi+O}$ -BiOBr samples.

| <b>Sample</b>                                    | <b>Bi atom%</b> | <b>O atom%</b> | <b>Br atom%</b> | <b>Mo atom%</b> | <b>Bi :O</b>  |
|--------------------------------------------------|-----------------|----------------|-----------------|-----------------|---------------|
| <b><math>V_{O}</math>-BiOBr</b>                  | <b>24.38</b>    | <b>31.25</b>   | <b>24.82</b>    | <b>0</b>        | <b>0.78:1</b> |
| <b>0.2 <math>Bi_2MoO_6/V_{Bi+O}</math>-BiOBr</b> | <b>21.52</b>    | <b>29.83</b>   | <b>23.16</b>    | <b>4.15</b>     | <b>0.72:1</b> |

**Table S2.** Elemental composition of the  $V_{O}$ -BiOBr and 0.2  $Bi_2MoO_6/V_{Bi+O}$ -BiOBr samples by inductively coupled plasma mass spectrometry (ICP-MS).

| <b>Sample</b>                                    | <b>Bi atom%</b> | <b>O atom%</b> | <b>Br atom%</b> | <b>Mo atom%</b> | <b>Bi :O</b>  |
|--------------------------------------------------|-----------------|----------------|-----------------|-----------------|---------------|
| <b><math>V_{O}</math>-BiOBr</b>                  | <b>25.64</b>    | <b>30.16</b>   | <b>28.94</b>    | <b>0</b>        | <b>0.85:1</b> |
| <b>0.2 <math>Bi_2MoO_6/V_{Bi+O}</math>-BiOBr</b> | <b>24.77</b>    | <b>30.98</b>   | <b>29.15</b>    | <b>4.24</b>     | <b>0.80:1</b> |



**Table S3.** Comparison of the photocatalytic performance of relevant catalysts towards N<sub>2</sub> fixation.

| Catalyst                                                        | Reaction medium            | Scavenger | Light source                           | Ammoniageneration rate | Reference        |
|-----------------------------------------------------------------|----------------------------|-----------|----------------------------------------|------------------------|------------------|
| <b>0.2 Bi<sub>2</sub>MoO<sub>6</sub>/V<sub>Bi+O</sub>-BiOBr</b> | H <sub>2</sub> O(l), 25 °C | No        | <b>300 W Xe lamp, Full range light</b> | <b>206 μmol/L/h</b>    | <b>This work</b> |
| <b>V<sub>O</sub>-BiOBr nanosheets</b>                           | H <sub>2</sub> O(l), 25 °C | No        | <b>300 W Xe lamp, Full range light</b> | <b>54.7 μmol/g/h</b>   | <b>S10</b>       |
| <b>BiOBr-001-OV</b>                                             | H <sub>2</sub> O(l), 25 °C | No        | <b>300 W Xe lamp, λ &gt; 420 nm</b>    | <b>104.2 μmol/g/h</b>  | <b>S11</b>       |
| <b>5 nm Bi<sub>5</sub>O<sub>7</sub>Br-NT</b>                    | H <sub>2</sub> O(l), 25 °C | No        | <b>300 W Xe lamp, λ &gt; 400 nm</b>    | <b>1.38 mmol/g/h</b>   | <b>S39</b>       |
| <b>defect-rich SUC Bi<sub>3</sub>O<sub>4</sub>Br</b>            | H <sub>2</sub> O(l), 25 °C | No        | <b>300 W Xe lamp, λ &gt; 400 nm</b>    | <b>25.4 μmol/L/h</b>   | <b>S15</b>       |
| <b>p-n Bi<sub>2</sub>MoO<sub>6</sub>/OV-BiOBr</b>               | H <sub>2</sub> O(l), 25 °C | No        | <b>300 W Xe lamp, λ &gt; 400 nm</b>    | <b>90.7 μmol/g/h</b>   | <b>S21</b>       |
| <b>0.5% Fe-Bi<sub>2</sub>MoO<sub>6</sub></b>                    | H <sub>2</sub> O(l), 25 °C | No        | <b>300 W Xe lamp, λ &gt; 400 nm</b>    | <b>106.5 μmol/g/h</b>  | <b>S25</b>       |
| <b>Bi<sub>5</sub>O<sub>7</sub>Br-40°C</b>                       | H <sub>2</sub> O(l), 25 °C | No        | <b>300 W xenon lamp (200-800 nm)</b>   | <b>12.72 mmol/g/h</b>  | <b>S32</b>       |
| <b>BiOBr-Fe-S-1</b>                                             | H <sub>2</sub> O(l), 25 °C | No        | <b>300 W Xe lamp, λ &gt; 400 nm</b>    | <b>46.1 μmol/g/h</b>   | <b>S12</b>       |
